# Supplementary material for: Unveiling Metabolic Phenotype Alterations in Anorexia Nervosa through Metabolomics
Source: MDPI journal article supplement (doi:10.3390/nu13124249), 2021-11-26
Supplement: s1 [file s1]

Review

# Unveiling Metabolic Phenotype Alterations in Anorexia Nervosa through Metabolomics

Laura Mayo-Martínez, Francisco J. Rupérez, Gabriel Á. Martos-Moreno, Montserrat Graell, Coral Barbas, Jesús Argente, and Antonia García

## SUPPLEMENTARY INFORMATION

**Supplementary Table S1.** Metabolites altered in human samples of individuals with AN.

| Metabolite                                           | Sample               | Sign of the alteration | Reference        |
|------------------------------------------------------|----------------------|------------------------|------------------|
| Glutamine                                            | Plasma/serum         | Altered*               | [47,48,51]       |
| Glycine                                              | Plasma/serum         | Altered*               | [47,48,51,55]    |
| Histidine                                            | Plasma/serum         | Altered*               | [47,48,51]       |
| Leucine                                              | Plasma/serum         | Altered*               | [47,48,51]       |
| Methionine                                           | Plasma/serum         | Altered*               | [47–49,51]       |
| Ornithine                                            | Serum                | Altered*               | [47,48]          |
| Phenylalanine                                        | Plasma/serum & Feces | Altered*               | [47,48,51,57,58] |
| Serine                                               | Plasma/serum & feces | Altered*               | [47,48,51,55,58] |
| Tryptophan                                           | Plasma/serum         | Altered*               | [47,48,51]       |
| Alanine                                              | Plasma/serum         | Altered*               | [51,55]          |
| Asparagine                                           | Serum                | Altered*               | [51]             |
| Betaine                                              | Plasma/serum         | Altered*               | [49,51]          |
| Allo-isoleucine                                      | Serum                | Decreased              | [51]             |
| Isoleucine                                           | Serum & feces        | Altered*               | [37,51]          |
| Proline                                              | Plasma/serum         | Altered*               | [47,48,51,55]    |
| Taurine                                              | Serum                | Altered*               | [51]             |
| Tyrosine                                             | Serum & feces        | Altered*               | [37,51]          |
| Arginine                                             | Plasma/serum         | Altered*               | [47,48,51]       |
| Aspartate                                            | Serum & feces        | Decreased              | [51,58]          |
| Valine                                               | Serum & feces        | Decreased              | [37,51]          |
| Threonine                                            | Serum & feces        | Altered*               | [37,47,48]       |
| Glutamate                                            | Serum & feces        | Altered*               | [51, 37]         |
| PC                                                   | Plasma               | Increased              | [47,48]          |
| LPC                                                  | Plasma               | Increased              | [47,48]          |
| SM                                                   | Plasma               | Increased              | [47,48]          |
| Carnitines                                           | Plasma               | Altered*               | [47,48,51]       |
| FFA                                                  | Plasma & feces       | Increased              | [52,53,56,57]    |
| 7 $\beta$ -Hydroxy-dehydro-epi-androsterone          | Plasma               | Decreased              | [50]             |
| 5-androstene-3 $\beta$ ,7 $\beta$ ,17 $\beta$ -triol | Plasma               | Decreased              | [50]             |
| Pregnenolone sulfate                                 | Plasma               | Increased              | [50]             |
| 20 $\alpha$ -dihydro-pregnenolone sulfate            | Plasma               | Increased              | [50]             |
| Glycerol                                             | Feces                | Decreased              | [37]             |
| Palmitate                                            | Feces                | Decreased              | [37]             |
| Glucose                                              | Serum                | Decreased              | [55]             |
| Hexoses                                              | Serum                | Altered*               | [47,48]          |

|                                 |               |           |               |
|---------------------------------|---------------|-----------|---------------|
| <b>Allose</b>                   | Feces         | Decreased | [37,58]       |
| <b>Arabinose</b>                | Feces         | Decreased | [37,58]       |
| <b>Lactose</b>                  | Feces         | Decreased | [37]          |
| <b>Rhamnose</b>                 | Feces         | Decreased | [37,57,58]    |
| <b>Scylloinositol</b>           | Feces         | Decreased | [37,57,58]    |
| <b>Xylose</b>                   | Feces         | Decreased | [37]          |
| <b>Sorbose</b>                  | Feces         | Decreased | [37]          |
| <b>Tagatose</b>                 | Feces         | Decreased | [37,58]       |
| <b>Fucose</b>                   | Feces         | Decreased | [57,58]       |
| <b>Citrate</b>                  | Serum         | Decreased | [51]          |
| <b>Malate</b>                   | Serum & feces | Decreased | [37,51]       |
| <b>Succinate</b>                | Serum & feces | Altered*  | [37,51]       |
| <b>Cis-aconitate</b>            | Serum         | Decreased | [51]          |
| <b>Hippurate</b>                | Serum         | Increased | [51]          |
| <b>P-Cresyl sulfate</b>         | Serum         | Increased | [51]          |
| <b>Indoxyl sulfate</b>          | Serum         | Increased | [51]          |
| <b>Indole-3-acetate</b>         | Serum         | Increased | [51]          |
| <b>Phenylacetate</b>            | Serum         | Increased | [51]          |
| <b>Phenyl sulfate</b>           | Serum         | Increased | [51]          |
| <b>Guanidinosuccinate</b>       | Serum         | Increased | [51]          |
| <b>N2-phenylacetylglutamine</b> | Serum         | Increased | [51]          |
| <b>Butyrate</b>                 | Feces         | Decreased | [37,54,57,58] |
| <b>Propionate</b>               | Feces         | Increased | [37,54,57,58] |
| <b>Acetate</b>                  | Feces         | Decreased | [37,54,57,58] |
| <b>GABA</b>                     | Feces         | Decreased | [37,54]       |
| <b>Dopamine</b>                 | Feces         | Decreased | [54]          |
| <b>Serotonin</b>                | Feces         | Decreased | [54]          |

\**Altered* refers to metabolites that have been found significant, but with different variation: increased in some studies, decreased in others.
